# Supplementary material for: Effect of slight structural difference in polyvinylidene fluoride binders on the electrochemical performance of single-crystal LiNi0.5Co0.2Mn0.3O2 cathode
Source: Royal Society of Chemistry journal article supplement (doi:10.1039/d3nj02493h), 2023-01-01
Supplement: d3nj02493h1.pdf [file d3nj02493h1.pdf]

## Supporting Information

### Effect of slight structural difference of polyvinylidene fluoride binders on the electrochemical performance of single crystal $\text{LiNi}_{0.5}\text{Co}_{0.2}\text{Mn}_{0.3}\text{O}_2$ cathode

Tangzhe Cao<sup>a, b</sup>, Huaming Xie<sup>a, b</sup>, Ying Lei<sup>a, b\*</sup>, Wei Zou<sup>a, b\*</sup>, Jue Zhang<sup>a</sup>, Kang Yang<sup>a</sup>, Tong Zan<sup>a</sup>, Liming Li<sup>a</sup>, Yongxian Fang<sup>a</sup>

<sup>a</sup>*College of Chemical Engineering, Sichuan University of Science and Engineering, Zigong 643000, PR China*

<sup>b</sup>*Innovation Center for Chenguang High Performance Fluorine Material, Sichuan University of Science and Engineering, Zigong 643000, PR China*

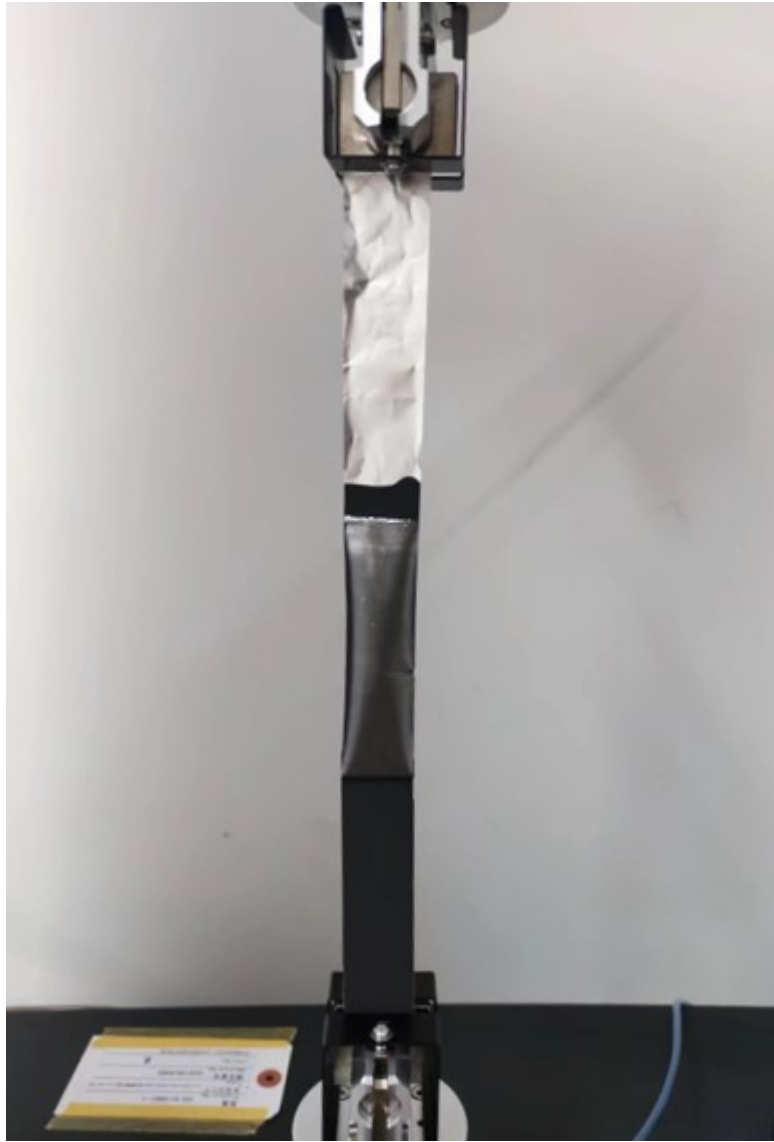

**Figure S1.** Peel Test Chart.

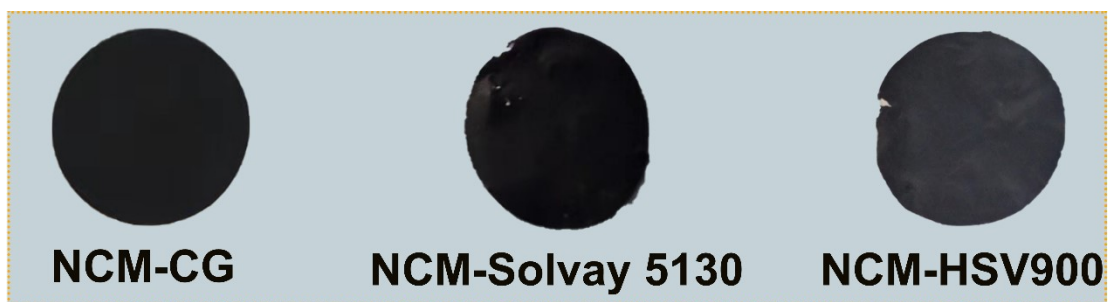

**Figure S2.** Electrode surface after 100 cycles at 2C magnification.

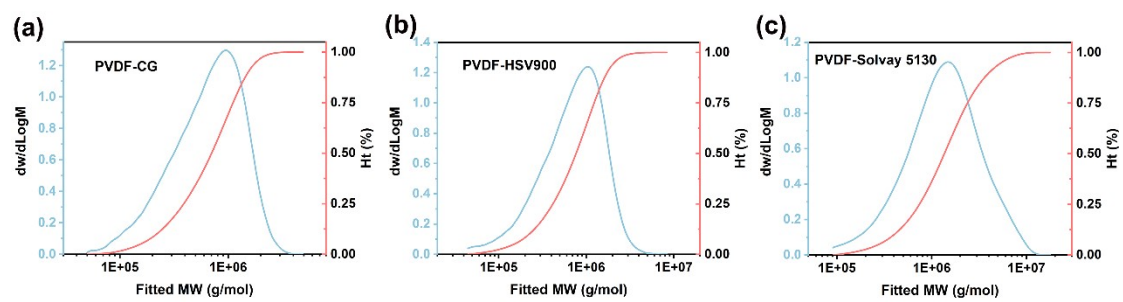

**Figure S3.** Different PVDF molecular weight distribution plot.

**Table S1.** The fitted results of Nyquist plots for NCM-CG, NCM-HSV900 and NCM-Solvay 5130 after 1<sup>st</sup> and 100<sup>th</sup> cycle

| Cycle number      | NCM-CG       |                 | NCM-HSV900   |                 | NCM-Solvay 5130 |                 |
|-------------------|--------------|-----------------|--------------|-----------------|-----------------|-----------------|
|                   | $R_f/\Omega$ | $R_{ct}/\Omega$ | $R_f/\Omega$ | $R_{ct}/\Omega$ | $R_f/\Omega$    | $R_{ct}/\Omega$ |
| 1 <sup>st</sup>   | 15.9         | 18.5            | 27.7         | 19.6            | 25.9            | 20.0            |
| 100 <sup>th</sup> | 19.9         | 198.3           | 31.7         | 282.3           | 24.9            | 231.3           |

**Table S2.** Molecular weight averages for PVDF-CG, PVDF-HSV900 and PVDF-Solvay 5130 .

| Peak   | Mp (g/mol) | Mn (g/mol) | Mw (g/mol) | Mz (g/mol) | Mz+1 (g/mol) | Mv (g/mol) | PD    |
|--------|------------|------------|------------|------------|--------------|------------|-------|
| CG     | 975461     | 458850     | 805773     | 1155421    | 1464680      | 1108645    | 1.756 |
| HSV900 | 1082937    | 464528     | 903225     | 1373002    | 1886913      | 1304730    | 1.944 |
| 5130   | 1562090    | 855666     | 1873791    | 3413268    | 5147580      | 3171269    | 2.19  |
